# Supplementary material
Source: PubMed Central journal article supplement (PMC5423164)

# Supplementary Figure 1

**A**

Whole Proteome Measurements in *ptp-3* and WT

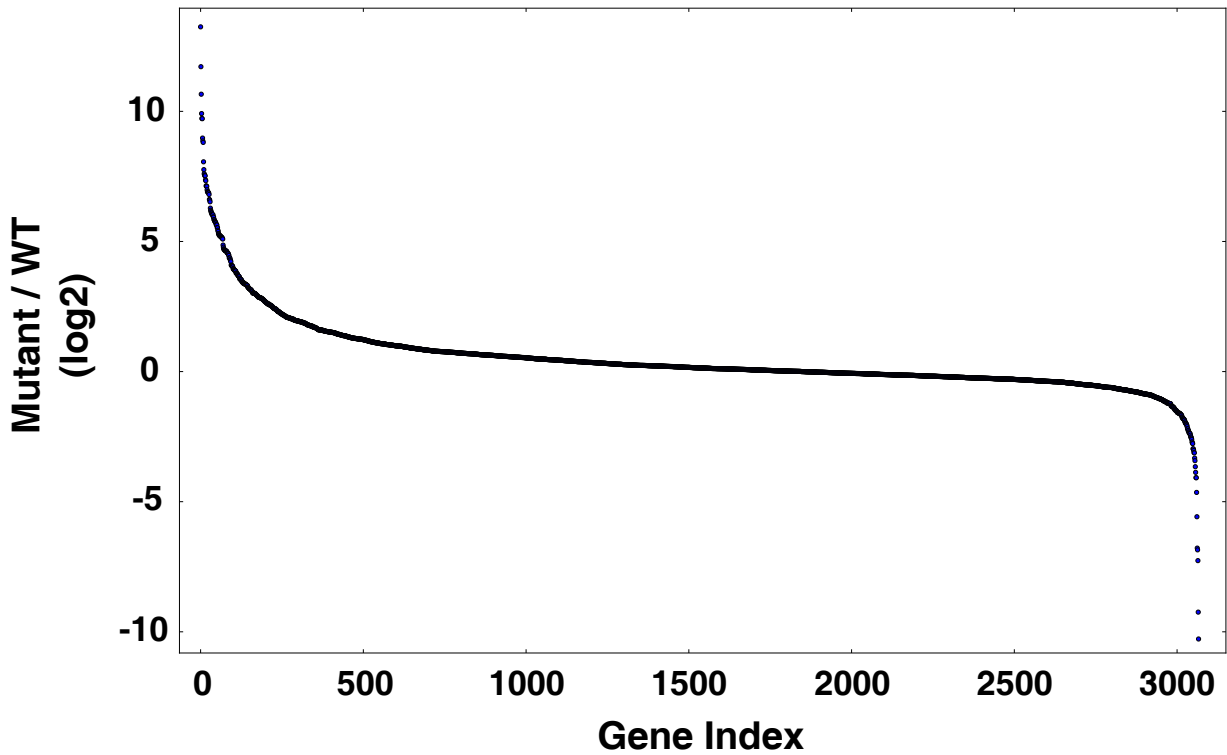

**B**

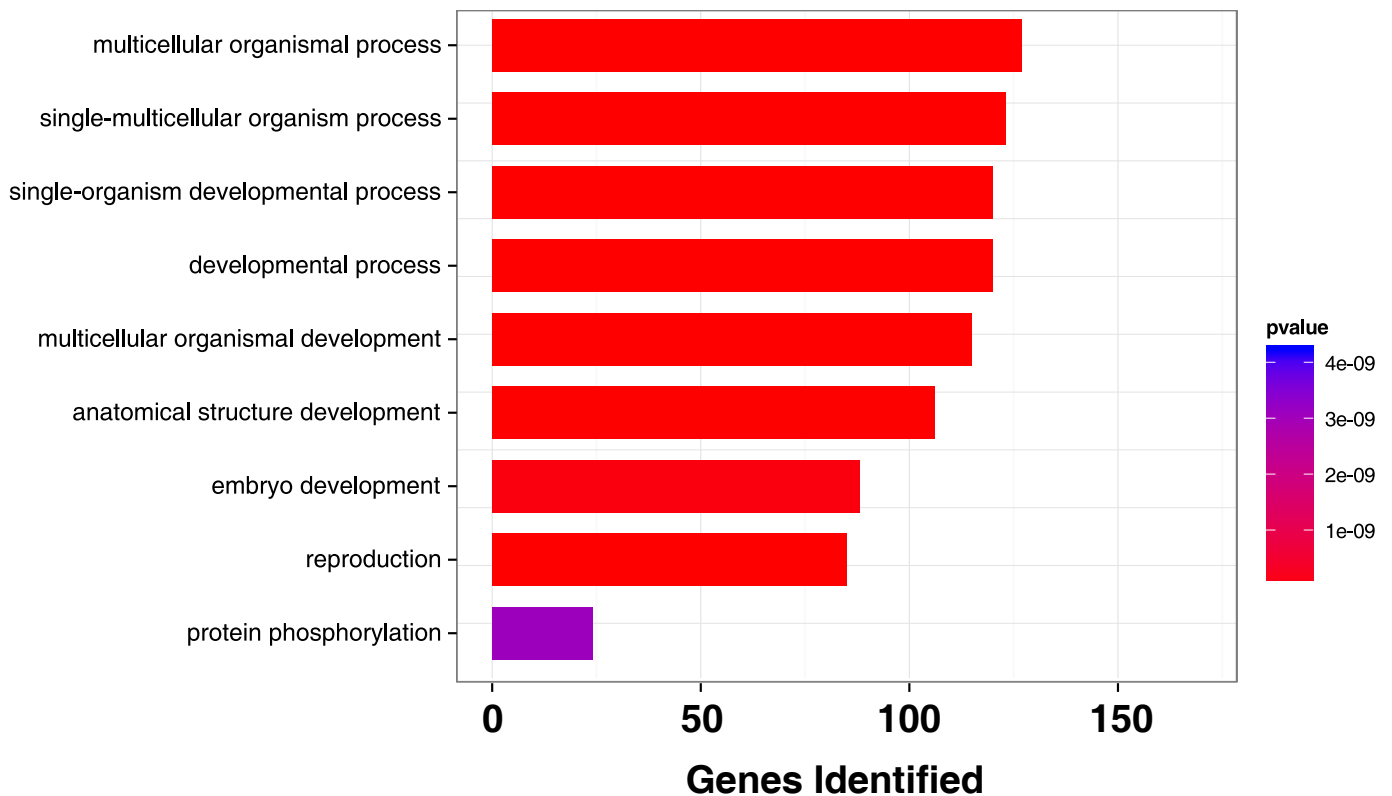

Supplement: MOL2-10-910-s001.pdf [file MOL2-10-910-s001.pdf]
